# Supplementary material for: Molecular Tools for the Detection and the Identification of Hymenoptera Parasitoids in Tortricid Fruit Pests
Source: Int J Mol Sci. 2017 Sep 22;18(10):2031. doi: 10.3390/ijms18102031 (PMC5666713; doi:10.3390/ijms18102031)
Supplement: Supplementary file 1 [file ijms-18-02031-s001.xlsx]

## Sheet: Appendix S1
Voucher		Morphological_identification									Sampling_references							Barcode_quality								Blast_result_(BOLD_July_2014)
Sample-ID	Genbank-ID	Phylum	Class	Order	Superfamily	Family	Subfamily	Genus	Species	Identified_by	Host_species	Collected_by	Collection_date	Country	Region	Sector	Lat_Lon	PCR_primer_fwd	PCR_primer_rev	Gene_identification	Seq_length (bp)	Protein_product	Ambiguities (%)	Trace_count	Barcode_compliance	Class	Order	Family	Subfamily	Genus	Species	Similarity (%)	Blast_status
Ev-06-1510	KP072518	Arthropoda	Insecta	Hymenoptera	Ichneumonoidea	Braconidae	Cheloninae	Ascogaster	quadridentata	Cuenot E	Cydia pomonella	Franck P	2007	France	Provence	Avignon	43.81 N 4.94 E	lco1490	hco2198	COI	658	Yes	0	2	Yes	Insecta	Hymenoptera	Braconidae	Cheloninae	Ascogaster	quadridentata	99.85	Early-Release
Ev-10-149	KP072519	Arthropoda	Insecta	Hymenoptera	Ichneumonoidea	Braconidae	Cheloninae	Ascogaster	quadridentata	Ferrero E	Cydia pomonella	Franck P	2010	France	Provence	Avignon	43.81 N 4.94 E	lco1490	hco2198	COI	658	Yes	0	2	Yes	Insecta	Hymenoptera	Braconidae	Cheloninae	Ascogaster	quadridentata	99.85	Early-Release
Ev-10-4374	KP072520	Arthropoda	Insecta	Hymenoptera	Ichneumonoidea	Braconidae	Cheloninae	Ascogaster	quadridentata	Ferrero E	Cydia pomonella	Franck P	2010	France	Provence	Avignon	43.81 N 4.94 E	lco1490	hco2198	COI	658	Yes	0	2	Yes	Insecta	Hymenoptera	Braconidae	Cheloninae	Ascogaster	quadridentata	99.85	Early-Release
Ev-10-563	KP072521	Arthropoda	Insecta	Hymenoptera	Ichneumonoidea	Braconidae	Cheloninae	Ascogaster	quadridentata	Ferrero E	Cydia pomonella	Franck P	2010	France	Provence	Avignon	43.81 N 4.94 E	lco1490	hco2198	COI	658	Yes	0	2	Yes	Insecta	Hymenoptera	Braconidae	Cheloninae	Ascogaster	quadridentata	99.85	Early-Release
Got-06-92	KP072522	Arthropoda	Insecta	Hymenoptera	Ichneumonoidea	Braconidae	Cheloninae	Ascogaster	quadridentata	Cuenot E	Cydia pomonella	Simon S	2007	France	Rhône-Alpes	Valence	44.97 N 4.93E	lco1490	hco2198	COI	658	Yes	1.8	2	Yes	Insecta	Hymenoptera	Braconidae	Cheloninae	Ascogaster	quadridentata	99.85	Early-Release
Ev-06-186	KP072523	Arthropoda	Insecta	Hymenoptera	Ichneumonoidea	Braconidae	Cheloninae	Ascogaster	quadridentata	Cuenot E	Cydia pomonella	Franck P	2006	France	Provence	Avignon	43.85 N 4.86 E	lco1490	hco2198	COI	658	Yes	0	2	Yes	Insecta	Hymenoptera	Braconidae	Cheloninae	Ascogaster	quadridentata	99.85	Early-Release
Ev-06-956	KP072524	Arthropoda	Insecta	Hymenoptera	Ichneumonoidea	Braconidae	Cheloninae	Ascogaster	quadridentata	Cuenot E	Cydia pomonella	Franck P	2007	France	Provence	Avignon	43.80 N 4.93 E	lco1490	hco2198	COI	658	Yes	0.6	2	Yes	Insecta	Hymenoptera	Braconidae	Cheloninae	Ascogaster	quadridentata	99.85	Early-Release
Ev-07-4639	KP072525	Arthropoda	Insecta	Hymenoptera	Ichneumonoidea	Braconidae	Cheloninae	Ascogaster	quadridentata	Dor C	Cydia pomonella	Franck P	2007	France	Provence	Avignon	43.84 N 4.94 E	lco1490	hco2198	COI	658	Yes	0	2	Yes	Insecta	Hymenoptera	Braconidae	Cheloninae	Ascogaster	quadridentata	99.85	Early-Release
Ev-07-5286	KP072526	Arthropoda	Insecta	Hymenoptera	Ichneumonoidea	Braconidae	Cheloninae	Ascogaster	quadridentata	Dor C	Grapholita molesta	Franck P	2007	France	Provence	Avignon	43.79 N 4.91 E	lco1490	hco2198	COI	658	Yes	0	2	Yes	Insecta	Hymenoptera	Braconidae	Cheloninae	Ascogaster	quadridentata	99.85	Early-Release
Ev-07-5305	KP072527	Arthropoda	Insecta	Hymenoptera	Ichneumonoidea	Braconidae	Cheloninae	Ascogaster	quadridentata	Dor C	Grapholita molesta	Franck P	2007	France	Provence	Avignon	43.79 N 4.91 E	lco1490	hco2198	COI	658	Yes	0	2	Yes	Insecta	Hymenoptera	Braconidae	Cheloninae	Ascogaster	quadridentata	100	Early-Release
Ev-07-5267	KP072528	Arthropoda	Insecta	Hymenoptera	Ichneumonoidea	Braconidae	Cheloninae	Ascogaster	quadridentata	Dor C	Grapholita molesta	Franck P	2007	France	Provence	Avignon	43.79 N 4.91 E	lco1490	hco2198	COI	658	Yes	0	2	Yes	Insecta	Hymenoptera	Braconidae	Cheloninae	Ascogaster	quadridentata	100	Early-Release
Ev-06-2106	KP072529	Arthropoda	Insecta	Hymenoptera	Ichneumonoidea	Braconidae	Cheloninae	Ascogaster	quadridentata	Cuenot E	Grapholita molesta	Franck P	2006	France	Provence	Avignon	43.79 N 4.90 E	lco1490	hco2198	COI	658	Yes	0	2	Yes	Insecta	Hymenoptera	Braconidae	Cheloninae	Ascogaster	quadridentata	99.54	Early-Release
Ev-07-5365	KP072530	Arthropoda	Insecta	Hymenoptera	Ichneumonoidea	Braconidae	Cheloninae	Ascogaster	quadridentata	Dor C	Grapholita molesta	Franck P	2007	France	Provence	Avignon	43.79 N 4.90 E	lco1490	hco2198	COI	658	Yes	0	2	Yes	Insecta	Hymenoptera	Braconidae	Cheloninae	Ascogaster	quadridentata	99.85	Early-Release
Ev-06-867	KP072531	Arthropoda	Insecta	Hymenoptera	Ichneumonoidea	Braconidae	Cheloninae	Ascogaster	quadridentata	Cuenot E	Cydia pomonella	Franck P	2006	France	Provence	Avignon	43.80 N 4.93 E	lco1490	hco2198	COI	658	Yes	0	2	Yes	Insecta	Hymenoptera	Braconidae	Cheloninae	Ascogaster	quadridentata	99.85	Early-Release
Ev-06-123	KP072532	Arthropoda	Insecta	Hymenoptera	Ichneumonoidea	Braconidae	Cheloninae	Ascogaster	quadridentata	Cuenot E	Cydia pomonella	Franck P	2006	France	Provence	Avignon	43.85 N 4.86 E	lco1490	hco2198	COI	658	Yes	0	2	Yes	Insecta	Hymenoptera	Braconidae	Cheloninae	Ascogaster	quadridentata	99.69	Early-Release
Ev-06-260	KP072533	Arthropoda	Insecta	Hymenoptera	Ichneumonoidea	Braconidae	Cheloninae	Ascogaster	quadridentata	Cuenot E	Cydia pomonella	Franck P	2006	France	Provence	Avignon	43.85 N 4.86 E	lco1490	hco2198	COI	658	Yes	0	2	Yes	Insecta	Hymenoptera	Braconidae	Cheloninae	Ascogaster	quadridentata	99.85	Early-Release
Ev-06-2608	KP072534	Arthropoda	Insecta	Hymenoptera	Ichneumonoidea	Braconidae	Cheloninae	Ascogaster	quadridentata	Cuenot E	Cydia pomonella	Franck P	2006	France	Provence	Avignon	43.82 N 4.92 E	lco1490	hco2198	COI	658	Yes	0.5	2	Yes	Insecta	Hymenoptera	Braconidae	Cheloninae	Ascogaster	quadridentata	99.85	Early-Release
Ev-06-2636	KP072535	Arthropoda	Insecta	Hymenoptera	Ichneumonoidea	Braconidae	Cheloninae	Ascogaster	quadridentata	Cuenot E	Cydia pomonella	Franck P	2006	France	Provence	Avignon	43.82 N 4.92 E	lco1490	hco2198	COI	658	Yes	0	2	Yes	Insecta	Hymenoptera	Braconidae	Cheloninae	Ascogaster	quadridentata	99.85	Early-Release
Got-06-91	KP072536	Arthropoda	Insecta	Hymenoptera	Ichneumonoidea	Braconidae	Cheloninae	Ascogaster	quadridentata	Cuenot E	Cydia pomonella	Simon S	2006	France	Rhône-Alpes	Valence	44.97 N 4.93E	lco1490	hco2198	COI	658	Yes	0	2	Yes	Insecta	Hymenoptera	Braconidae	Cheloninae	Ascogaster	quadridentata	99.85	Early-Release
Got-06-107	KP072537	Arthropoda	Insecta	Hymenoptera	Ichneumonoidea	Braconidae	Cheloninae	Ascogaster	quadridentata	Cuenot E	Cydia pomonella	Simon S	2006	France	Rhône-Alpes	Valence	44.97 N 4.93E	lco1490	hco2198	COI	658	Yes	0.2	2	Yes	Insecta	Hymenoptera	Braconidae	Cheloninae	Ascogaster	quadridentata	99.85	Early-Release
Div-09-Pm1Aq	KP072538	Arthropoda	Insecta	Hymenoptera	Ichneumonoidea	Braconidae	Cheloninae	Ascogaster	quadridentata	Franck P	Grapholita molesta	Siegwart M	2009	France	Rhône-Alpes	Valence	44.84 N 4.90 E	lco1490	hco2198	COI	658	Yes	0	2	Yes	Insecta	Hymenoptera	Braconidae	Cheloninae	Ascogaster	quadridentata	99.69	Early-Release
Frcef-07-26	KP072539	Arthropoda	Insecta	Hymenoptera	Ichneumonoidea	Braconidae	Cheloninae	Ascogaster	quadridentata	Dor C	Cydia pomonella	Sauphanor B	2007	France	Midi-Pyrénée	Montauban	44.02 N 1.35 E	lco1490	hco2198	COI	658	Yes	0	2	Yes	Insecta	Hymenoptera	Braconidae	Cheloninae	Ascogaster	quadridentata	99.69	Early-Release
Alldo-07-60	KP072540	Arthropoda	Insecta	Hymenoptera	Ichneumonoidea	Braconidae	Cheloninae	Ascogaster	quadridentata	Dor C	Cydia pomonella	Sauphanor B	2007	Germany	Bade-Wurtemberg	Heidelberg	49.45 N 8.67 E	lco1490	hco2198	COI	658	Yes	0.2	2	Yes	Insecta	Hymenoptera	Braconidae	Cheloninae	Ascogaster	quadridentata	99.85	Early-Release
Alldo-07-65	KP072541	Arthropoda	Insecta	Hymenoptera	Ichneumonoidea	Braconidae	Cheloninae	Ascogaster	quadridentata	Dor C	Cydia pomonella	Sauphanor B	2007	Germany	Bade-Wurtemberg	Heidelberg	49.45 N 8.67 E	lco1490	hco2198	COI	658	Yes	0	2	Yes	Insecta	Hymenoptera	Braconidae	Cheloninae	Ascogaster	quadridentata	100	Early-Release
Ev-10-4372	KP072542	Arthropoda	Insecta	Hymenoptera	Ichneumonoidea	Braconidae	Cheloninae	Ascogaster	quadridentata	Ferrero E	Grapholita molesta	Franck P	2010	France	Provence	Avignon	43.81 N 4.94 E	lco1490	hco2198	COI	658	Yes	0	2	Yes	Insecta	Hymenoptera	Braconidae	Cheloninae	Ascogaster	quadridentata	99.85	Early-Release
Ev-10-4270	KP072543	Arthropoda	Insecta	Hymenoptera	Ichneumonoidea	Braconidae	Cheloninae	Ascogaster	quadridentata	Ferrero E	Cydia pomonella	Franck P	2010	France	Provence	Avignon	43.81 N 4.94 E	lco1490	hco2198	COI	658	Yes	0	2	Yes	Insecta	Hymenoptera	Braconidae	Cheloninae	Ascogaster	quadridentata	99.85	Early-Release
Ev-10-238	KP072544	Arthropoda	Insecta	Hymenoptera	Ichneumonoidea	Braconidae	Cheloninae	Ascogaster	quadridentata	Ferrero E	Cydia pomonella	Franck P	2010	France	Provence	Avignon	43.81 N 4.94 E	lco1490	hco2198	COI	658	Yes	0	2	Yes	Insecta	Hymenoptera	Braconidae	Cheloninae	Ascogaster	quadridentata	99.85	Early-Release
Ev-10-7261	KP072545	Arthropoda	Insecta	Hymenoptera	Ichneumonoidea	Braconidae	Cheloninae	Ascogaster	quadridentata	Ferrero E	Cydia pomonella	Franck P	2010	France	Provence	Valence	44.97 N 4.93E	lco1490	hco2198	COI	658	Yes	0	2	Yes	Insecta	Hymenoptera	Braconidae	Cheloninae	Ascogaster	quadridentata	99.85	Early-Release
Tch-05-212	KP072546	Arthropoda	Insecta	Hymenoptera	Ichneumonoidea	Ichneumonidae	Cremastinae	Pristomerus	vulnerator	Cuenot E	Cydia pomonella	Pultar O	2005	Czech Republic	Hradec-Králové	Königgrätz	50.17 N 15.70 E	lco1490	hco2198	COI	658	Yes	0	2	Yes	Insecta	Hymenoptera	Ichneumonidae				100	Private
Alldo-07-38	KP072547	Arthropoda	Insecta	Hymenoptera	Ichneumonoidea	Ichneumonidae	Cremastinae	Pristomerus	vulnerator	Dor C	Cydia pomonella	Sauphanor B	2007	Germany	Bade-Wurtemberg	Heidelberg	49.45 N 8.67 E	lco1490	hco2198	COI	658	Yes	0	2	Yes	Insecta	Hymenoptera	Ichneumonidae				99.66	Private
Ev-10-8870	KP072548	Arthropoda	Insecta	Hymenoptera	Ichneumonoidea	Ichneumonidae	Cremastinae	Pristomerus	vulnerator	Ferrero E	Cydia pomonella	Franck P	2010	France	Rhône-Alpes	Valence	44.97 N 4.93E	lco1490	hco2198	COI	658	Yes	0	2	Yes	Insecta	Hymenoptera	Ichneumonidae				100	Private
Ev-10-8852	KP072549	Arthropoda	Insecta	Hymenoptera	Ichneumonoidea	Ichneumonidae	Cremastinae	Pristomerus	vulnerator	Ferrero E	Cydia pomonella	Franck P	2010	France	Rhône-Alpes	Valence	44.97 N 4.93E	lco1490	hco2198	COI	658	Yes	0	2	Yes	Insecta	Hymenoptera	Ichneumonidae				100	Private
Ev-10-8693	KP072550	Arthropoda	Insecta	Hymenoptera	Ichneumonoidea	Ichneumonidae	Cremastinae	Pristomerus	vulnerator	Ferrero E	Cydia pomonella	Franck P	2010	France	Rhône-Alpes	Valence	44.97 N 4.93E	lco1490	hco2198	COI	658	Yes	0	2	Yes	Insecta	Hymenoptera	Ichneumonidae				100	Private
Ev-10-8377	KP072551	Arthropoda	Insecta	Hymenoptera	Ichneumonoidea	Ichneumonidae	Cremastinae	Pristomerus	vulnerator	Ferrero E	Cydia pomonella	Franck P	2010	France	Rhône-Alpes	Valence	44.97 N 4.93E	lco1490	hco2198	COI	658	Yes	0	2	Yes	Insecta	Hymenoptera	Ichneumonidae				100	Private
Ev-10-8374	KP072552	Arthropoda	Insecta	Hymenoptera	Ichneumonoidea	Ichneumonidae	Cremastinae	Pristomerus	vulnerator	Ferrero E	Cydia pomonella	Franck P	2010	France	Rhône-Alpes	Valence	44.97 N 4.93E	lco1490	hco2198	COI	658	Yes	0	2	Yes	Insecta	Hymenoptera	Ichneumonidae				100	Private
Ev-10-8359	KP072553	Arthropoda	Insecta	Hymenoptera	Ichneumonoidea	Ichneumonidae	Cremastinae	Pristomerus	vulnerator	Ferrero E	Cydia pomonella	Franck P	2010	France	Rhône-Alpes	Valence	44.97 N 4.93E	lco1490	hco2198	COI	658	Yes	0	2	Yes	Insecta	Hymenoptera	Ichneumonidae				100	Private
Ev-10-8308	KP072554	Arthropoda	Insecta	Hymenoptera	Ichneumonoidea	Ichneumonidae	Cremastinae	Pristomerus	vulnerator	Ferrero E	Cydia pomonella	Franck P	2010	France	Rhône-Alpes	Valence	44.97 N 4.93E	lco1490	hco2198	COI	658	Yes	0	2	Yes	Insecta	Hymenoptera	Ichneumonidae				100	Private
Ev-10-7809	KP072555	Arthropoda	Insecta	Hymenoptera	Ichneumonoidea	Ichneumonidae	Cremastinae	Pristomerus	vulnerator	Ferrero E	Cydia pomonella	Franck P	2010	France	Rhône-Alpes	Valence	44.97 N 4.93E	lco1490	hco2198	COI	658	Yes	0	2	Yes	Insecta	Hymenoptera	Ichneumonidae				100	Private
Ev-10-648	KP072556	Arthropoda	Insecta	Hymenoptera	Ichneumonoidea	Ichneumonidae	Cremastinae	Pristomerus	vulnerator	Ferrero E	Cydia pomonella	Franck P	2010	France	Provence	Avignon	43.81 N 4.94 E	lco1490	hco2198	COI	658	Yes	0.3	2	Yes	Insecta	Hymenoptera	Ichneumonidae				100	Private
Ev-10-7310	KP072557	Arthropoda	Insecta	Hymenoptera	Ichneumonoidea	Ichneumonidae	Cremastinae	Pristomerus	vulnerator	Ferrero E	Cydia pomonella	Franck P	2010	France	Rhône-Alpes	Valence	44.97 N 4.93E	lco1490	hco2198	COI	658	Yes	0	2	Yes	Insecta	Hymenoptera	Ichneumonidae				100	Private
Ev-10-7329	KP072558	Arthropoda	Insecta	Hymenoptera	Ichneumonoidea	Ichneumonidae	Cremastinae	Pristomerus	vulnerator	Ferrero E	Cydia pomonella	Franck P	2010	France	Rhône-Alpes	Valence	44.97 N 4.93E	lco1490	hco2198	COI	658	Yes	0	2	Yes	Insecta	Hymenoptera	Ichneumonidae				100	Private
Ev-10-7341	KP072559	Arthropoda	Insecta	Hymenoptera	Ichneumonoidea	Ichneumonidae	Cremastinae	Pristomerus	vulnerator	Ferrero E	Cydia pomonella	Franck P	2010	France	Rhône-Alpes	Valence	44.97 N 4.93E	lco1490	hco2198	COI	658	Yes	0	2	Yes	Insecta	Hymenoptera	Ichneumonidae				100	Private
Ev-10-7425	KP072560	Arthropoda	Insecta	Hymenoptera	Ichneumonoidea	Ichneumonidae	Cremastinae	Pristomerus	vulnerator	Ferrero E	Cydia pomonella	Franck P	2010	France	Rhône-Alpes	Valence	44.97 N 4.93E	lco1490	hco2198	COI	658	Yes	0	2	Yes	Insecta	Hymenoptera	Ichneumonidae				100	Private
Ev-10-7453	KP072561	Arthropoda	Insecta	Hymenoptera	Ichneumonoidea	Ichneumonidae	Cremastinae	Pristomerus	vulnerator	Ferrero E	Cydia pomonella	Franck P	2010	France	Rhône-Alpes	Valence	44.97 N 4.93E	lco1490	hco2198	COI	658	Yes	0	2	Yes	Insecta	Hymenoptera	Ichneumonidae				100	Private
Ev-10-7628	KP072562	Arthropoda	Insecta	Hymenoptera	Ichneumonoidea	Ichneumonidae	Cremastinae	Pristomerus	vulnerator	Ferrero E	Cydia pomonella	Franck P	2010	France	Rhône-Alpes	Valence	44.97 N 4.93E	lco1490	hco2198	COI	658	Yes	0	2	Yes	Insecta	Hymenoptera	Ichneumonidae				100	Private
Ev-10-7716	KP072563	Arthropoda	Insecta	Hymenoptera	Ichneumonoidea	Ichneumonidae	Cremastinae	Pristomerus	vulnerator	Ferrero E	Cydia pomonella	Franck P	2010	France	Rhône-Alpes	Valence	44.97 N 4.93E	lco1490	hco2198	COI	658	Yes	0	2	Yes	Insecta	Hymenoptera	Ichneumonidae				100	Private
Ev-06-113	KP072564	Arthropoda	Insecta	Hymenoptera	Ichneumonoidea	Ichneumonidae	Cremastinae	Pristomerus	vulnerator	Cuenot E	Cydia pomonella	Franck P	2006	France	Provence	Avignon	43.85 N 4.86 E	lco1490	hco2198	COI	658	Yes	0.8	2	Yes	Insecta	Hymenoptera	Ichneumonidae				100	Private
Ev-06-1686	KP072565	Arthropoda	Insecta	Hymenoptera	Ichneumonoidea	Ichneumonidae	Cremastinae	Pristomerus	vulnerator	Cuenot E	Cydia pomonella	Franck P	2006	France	Provence	Avignon	43.81 N 4.94 E	lco1490	hco2198	COI	658	Yes	0	4	Yes	Insecta	Hymenoptera	Ichneumonidae				100	Private
Ev-06-2676	KP072566	Arthropoda	Insecta	Hymenoptera	Ichneumonoidea	Ichneumonidae	Cremastinae	Pristomerus	vulnerator	Cuenot E	Cydia pomonella	Franck P	2006	France	Provence	Avignon	43.82 N 4.92 E	lco1490	hco2198	COI	658	Yes	0.5	4	Yes	Insecta	Hymenoptera	Ichneumonidae				100	Private
Ev-06-527	KP072567	Arthropoda	Insecta	Hymenoptera	Ichneumonoidea	Ichneumonidae	Cremastinae	Pristomerus	vulnerator	Cuenot E	Cydia pomonella	Franck P	2006	France	Provence	Avignon	43.85 N 4.86 E	lco1490	hco2198	COI	658	Yes	0	2	Yes	Insecta	Hymenoptera	Ichneumonidae				100	Private
Ev-07-6275	KP072568	Arthropoda	Insecta	Hymenoptera	Ichneumonoidea	Ichneumonidae	Cremastinae	Pristomerus	vulnerator	Dor C	Cydia pomonella	Franck P	2007	France	Provence	Avignon	43.85 N 4.86 E	lco1490	hco2198	COI	658	Yes	0	2	Yes	Insecta	Hymenoptera	Ichneumonidae				100	Private
Ev-07-7186	KP072569	Arthropoda	Insecta	Hymenoptera	Ichneumonoidea	Ichneumonidae	Cremastinae	Pristomerus	vulnerator	Dor C	Cydia pomonella	Franck P	2007	France	Provence	Avignon	43.80 N 4.93 E	lco1490	hco2198	COI	658	Yes	0	2	Yes	Insecta	Hymenoptera	Ichneumonidae				100	Private
Ev-07-5881	KP072570	Arthropoda	Insecta	Hymenoptera	Ichneumonoidea	Ichneumonidae	Cremastinae	Pristomerus	vulnerator	Dor C	Cydia pomonella	Franck P	2007	France	Provence	Avignon	43.80 N 4.93 E	lco1490	hco2198	COI	658	Yes	0	2	Yes	Insecta	Hymenoptera	Ichneumonidae				99.32	Private
Ev-07-6237	KP072571	Arthropoda	Insecta	Hymenoptera	Ichneumonoidea	Ichneumonidae	Cremastinae	Pristomerus	vulnerator	Dor C	Cydia pomonella	Franck P	2007	France	Provence	Avignon	43.85 N 4.86 E	lco1490	hco2198	COI	658	Yes	0	2	Yes	Insecta	Hymenoptera	Ichneumonidae				99.32	Private
Ev-07-5065	KP072572	Arthropoda	Insecta	Hymenoptera	Ichneumonoidea	Ichneumonidae	Cremastinae	Pristomerus	vulnerator	Dor C	Cydia pomonella	Franck P	2007	France	Provence	Avignon	43.79 N 4.90 E	lco1490	hco2198	COI	658	Yes	0	2	Yes	Insecta	Hymenoptera	Ichneumonidae				99.32	Private
Ev-07-5075	KP072573	Arthropoda	Insecta	Hymenoptera	Ichneumonoidea	Ichneumonidae	Cremastinae	Pristomerus	vulnerator	Dor C	Cydia pomonella	Franck P	2007	France	Provence	Avignon	43.79 N 4.90 E	lco1490	hco2198	COI	658	Yes	0	2	Yes	Insecta	Hymenoptera	Ichneumonidae				99.32	Private
Ev-07-5102	KP072574	Arthropoda	Insecta	Hymenoptera	Ichneumonoidea	Ichneumonidae	Cremastinae	Pristomerus	vulnerator	Dor C	Cydia pomonella	Franck P	2007	France	Provence	Avignon	43.79 N 4.90 E	lco1490	hco2198	COI	658	Yes	0	2	Yes	Insecta	Hymenoptera	Ichneumonidae				99.32	Private
Ev-06-1734	KP072575	Arthropoda	Insecta	Hymenoptera	Ichneumonoidea	Ichneumonidae	Cremastinae	Pristomerus	vulnerator	Cuenot E	Cydia pomonella	Franck P	2006	France	Provence	Avignon	43.81 N 4.94 E	lco1490	hco2198	COI	658	Yes	0	2	Yes	Insecta	Hymenoptera	Ichneumonidae				99.32	Private
Ev-06-2279	KP072576	Arthropoda	Insecta	Hymenoptera	Ichneumonoidea	Ichneumonidae	Cremastinae	Pristomerus	vulnerator	Cuenot E	Grapholita molesta	Franck P	2006	France	Provence	Avignon	43.79 N 4.90 E	lco1490	hco2198	COI	658	Yes	0	2	Yes	Insecta	Hymenoptera	Ichneumonidae				99.32	Private
Ev-06-1800	KP072577	Arthropoda	Insecta	Hymenoptera	Ichneumonoidea	Ichneumonidae	Cremastinae	Pristomerus	vulnerator	Cuenot E	Grapholita molesta	Franck P	2006	France	Provence	Avignon	43.81 N 4.94 E	lco1490	hco2198	COI	658	Yes	0.6	4	Yes	Insecta	Hymenoptera	Ichneumonidae				99.32	Private
Ev-06-1669	KP072578	Arthropoda	Insecta	Hymenoptera	Ichneumonoidea	Ichneumonidae	Cremastinae	Pristomerus	vulnerator	Cuenot E	Cydia pomonella	Franck P	2006	France	Provence	Avignon	43.81 N 4.94 E	lco1490	hco2198	COI	658	Yes	0	2	Yes	Insecta	Hymenoptera	Ichneumonidae				99.32	Private
Ev-06-196	KP072579	Arthropoda	Insecta	Hymenoptera	Ichneumonoidea	Ichneumonidae	Cremastinae	Pristomerus	vulnerator	Cuenot E	Cydia pomonella	Franck P	2006	France	Provence	Avignon	43.85 N 4.86 E	lco1490	hco2198	COI	658	Yes	0	2	Yes	Insecta	Hymenoptera	Ichneumonidae				99.32	Private
Ev-06-2753	KP072580	Arthropoda	Insecta	Hymenoptera	Ichneumonoidea	Ichneumonidae	Cremastinae	Pristomerus	vulnerator	Cuenot E	Cydia pomonella	Franck P	2006	France	Provence	Avignon	43.80 N 4.93 E	lco1490	hco2198	COI	658	Yes	0	2	Yes	Insecta	Hymenoptera	Ichneumonidae				99.32	Private
Ev-06-2784	KP072581	Arthropoda	Insecta	Hymenoptera	Ichneumonoidea	Ichneumonidae	Cremastinae	Pristomerus	vulnerator	Cuenot E	Cydia pomonella	Franck P	2006	France	Provence	Avignon	43.80 N 4.93 E	lco1490	hco2198	COI	658	Yes	0	2	Yes	Insecta	Hymenoptera	Ichneumonidae				99.32	Private
Ev-06-175	KP072582	Arthropoda	Insecta	Hymenoptera	Ichneumonoidea	Ichneumonidae	Cremastinae	Pristomerus	vulnerator	Cuenot E	Cydia pomonella	Franck P	2006	France	Provence	Avignon	43.85 N 4.86 E	lco1490	hco2198	COI	658	Yes	0	2	Yes	Insecta	Hymenoptera	Ichneumonidae				99.15	Private
Ev-06-1775	KP072583	Arthropoda	Insecta	Hymenoptera	Ichneumonoidea	Ichneumonidae	Cremastinae	Pristomerus	vulnerator	Cuenot E	Cydia pomonella	Franck P	2006	France	Provence	Avignon	43.81 N 4.94 E	lco1490	hco2198	COI	658	Yes	0	2	Yes	Insecta	Hymenoptera	Ichneumonidae				99.32	Private
Ev-06-2747	KP072584	Arthropoda	Insecta	Hymenoptera	Ichneumonoidea	Ichneumonidae	Cremastinae	Pristomerus	vulnerator	Cuenot E	Cydia pomonella	Franck P	2006	France	Provence	Avignon	43.80 N 4.93 E	lco1490	hco2198	COI	658	Yes	0.2	2	Yes	Insecta	Hymenoptera	Ichneumonidae				99.32	Private
Ev-06-2819	KP072585	Arthropoda	Insecta	Hymenoptera	Ichneumonoidea	Ichneumonidae	Cremastinae	Pristomerus	vulnerator	Cuenot E	Cydia pomonella	Franck P	2006	France	Provence	Avignon	43.80 N 4.93 E	lco1490	hco2198	COI	658	Yes	0	2	Yes	Insecta	Hymenoptera	Ichneumonidae				99.49	Private
Ev-06-2798	KP072586	Arthropoda	Insecta	Hymenoptera	Ichneumonoidea	Ichneumonidae	Cremastinae	Pristomerus	vulnerator	Cuenot E	Cydia pomonella	Franck P	2006	France	Provence	Avignon	43.80 N 4.93 E	lco1490	hco2198	COI	658	Yes	0	2	Yes	Insecta	Hymenoptera	Ichneumonidae				99.49	Private
Ev-06-2936	KP072587	Arthropoda	Insecta	Hymenoptera	Ichneumonoidea	Ichneumonidae	Cremastinae	Pristomerus	vulnerator	Cuenot E	Cydia pomonella	Franck P	2006	France	Provence	Avignon	43.80 N 4.93 E	lco1490	hco2198	COI	658	Yes	0	2	Yes	Insecta	Hymenoptera	Ichneumonidae				99.49	Private
Ev-06-2871	KP072588	Arthropoda	Insecta	Hymenoptera	Ichneumonoidea	Ichneumonidae	Cremastinae	Pristomerus	vulnerator	Cuenot E	Cydia pomonella	Franck P	2006	France	Provence	Avignon	43.80 N 4.93 E	lco1490	hco2198	COI	658	Yes	0	2	Yes	Insecta	Hymenoptera	Ichneumonidae				99.49	Private
Ev-08-10245	KP072589	Arthropoda	Insecta	Hymenoptera	Ichneumonoidea	Ichneumonidae	Cremastinae	Pristomerus	vulnerator	Franck P	Cydia pomonella	Franck P	2008	France	Provence	Avignon	43.80 N 4.93 E	lco1490	hco2198	COI	658	Yes	0	2	Yes	Insecta	Hymenoptera	Ichneumonidae				99.32	Private
Div-09-Pm1Pv	KP072590	Arthropoda	Insecta	Hymenoptera	Ichneumonoidea	Ichneumonidae	Cremastinae	Pristomerus	vulnerator	Siegwart M	Grapholita molesta	Siegwart M	2009	France	Rhône-Alpes	Valence	44.84 N 4.90 E	lco1490	hco2198	COI	658	Yes	0	2	Yes	Insecta	Hymenoptera	Ichneumonidae				99.32	Private
Alldo-07-10	KP072591	Arthropoda	Insecta	Hymenoptera	Ichneumonoidea	Ichneumonidae	Anomaloninae	Trichomma	enecator	Dor C	Cydia pomonella	Sauphanor B	2007	Germany	Bade-Wurtemberg	Heidelberg	49.45 N 8.67 E	lco1490	hco2198	COI	658	Yes	0	2	Yes	Insecta	Hymenoptera	Ichneumonidae	Anomaloninae	Trichomma	cnaphalocrocis	90.59	Private
Alldo-07-12	KP072592	Arthropoda	Insecta	Hymenoptera	Ichneumonoidea	Ichneumonidae	Anomaloninae	Trichomma	enecator	Dor C	Cydia pomonella	Sauphanor B	2007	Germany	Bade-Wurtemberg	Heidelberg	49.45 N 8.67 E	lco1490	hco2198	COI	658	Yes	0.3	2	Yes	Insecta	Hymenoptera	Ichneumonidae	Anomaloninae	Trichomma	cnaphalocrocis	90.59	Private
Alldo-07-2	KP072593	Arthropoda	Insecta	Hymenoptera	Ichneumonoidea	Ichneumonidae	Anomaloninae	Trichomma	enecator	Dor C	Cydia pomonella	Sauphanor B	2007	Germany	Bade-Wurtemberg	Heidelberg	49.45 N 8.67 E	lco1490	hco2198	COI	658	Yes	0	2	Yes	Insecta	Hymenoptera	Ichneumonidae	Anomaloninae	Trichomma	cnaphalocrocis	90.59	Private
Alldo-07-3	KP072594	Arthropoda	Insecta	Hymenoptera	Ichneumonoidea	Ichneumonidae	Anomaloninae	Trichomma	enecator	Dor C	Cydia pomonella	Sauphanor B	2007	Germany	Bade-Wurtemberg	Heidelberg	49.45 N 8.67 E	lco1490	hco2198	COI	658	Yes	0	2	Yes	Insecta	Hymenoptera	Ichneumonidae	Anomaloninae	Trichomma	cnaphalocrocis	90.59	Private
FRCEH-07-01	KP072595	Arthropoda	Insecta	Hymenoptera	Ichneumonoidea	Ichneumonidae	Anomaloninae	Trichomma	enecator	Dor C	Cydia pomonella	Sauphanor B	2007	France	Languedoc	Nîmes	43.66 N 4.18 E	lco1490	hco2198	COI	658	Yes	0	2	Yes	Insecta	Hymenoptera	Ichneumonidae	Anomaloninae	Trichomma	cnaphalocrocis	90.59	Private
FRCTS-07-10	KP072596	Arthropoda	Insecta	Hymenoptera	Ichneumonoidea	Ichneumonidae	Anomaloninae	Trichomma	enecator	Dor C	Cydia pomonella	Sauphanor B	2007	France	Normandie	Alençon	48.61 N 0.17 E	lco1490	hco2198	COI	658	Yes	0	2	Yes	Insecta	Hymenoptera	Ichneumonidae	Anomaloninae	Trichomma	cnaphalocrocis	90.59	Private
FRCTS-07-12	KP072597	Arthropoda	Insecta	Hymenoptera	Ichneumonoidea	Ichneumonidae	Anomaloninae	Trichomma	enecator	Dor C	Cydia pomonella	Sauphanor B	2007	France	Normandie	Alençon	48.61 N 0.17 E	lco1490	hco2198	COI	658	Yes	0	2	Yes	Insecta	Hymenoptera	Ichneumonidae	Anomaloninae	Trichomma	cnaphalocrocis	90.74	Private
Got-06-95	KP072598	Arthropoda	Insecta	Hymenoptera	Chalcidoidea	Perilampidae		Perilampus	tristis	Rasplus JY	Cydia pomonella	Simon S	2006	France	Rhône-Alpes	Valence	44.97 N 4.93E	lco1490	hco2198	COI	652	Yes	0	4	Yes	Insecta	Hymenoptera	Perilampidae		Perilampus	chrysopae	93.92	Early-Release
Got-06-111	KP072599	Arthropoda	Insecta	Hymenoptera	Chalcidoidea	Perilampidae		Perilampus	tristis	Rasplus JY	Cydia pomonella	Simon S	2005	France	Rhône-Alpes	Valence	44.97 N 4.93E	lco1490	hco2198	COI	652	Yes	0	2	Yes	Insecta	Hymenoptera	Perilampidae		Perilampus	chrysopae	93.92	Early-Release
Got-05-196	KP072600	Arthropoda	Insecta	Hymenoptera	Chalcidoidea	Perilampidae		Perilampus	tristis	Rasplus JY	Cydia pomonella	Simon S	2005	France	Rhône-Alpes	Valence	44.97 N 4.93E	lco1490	hco2198	COI	652	Yes	4.7	4	Yes	Insecta	Hymenoptera	Perilampidae		Perilampus	chrysopae	94.25	Early-Release
Got-06-89	KP072601	Arthropoda	Insecta	Hymenoptera	Chalcidoidea	Perilampidae		Perilampus	tristis	Rasplus JY	Cydia pomonella	Simon S	2007	France	Rhône-Alpes	Valence	44.97 N 4.93E	lco1490	hco2198	COI	652	Yes	0.6	2	Yes	Insecta	Hymenoptera	Perilampidae		Perilampus	chrysopae	94.25	Early-Release
Ev-06-323	KP072602	Arthropoda	Insecta	Hymenoptera	Chalcidoidea	Perilampidae		Perilampus	tristis	Rasplus JY	Cydia pomonella	Simon S	2006	France	Provence	Avignon	43.85 N 4.86 E	lco1490	hco2198	COI	652	Yes	0.3	2	Yes	Insecta	Hymenoptera	Perilampidae		Perilampus	chrysopae	94.25	Early-Release
Ev-06-502	KP072603	Arthropoda	Insecta	Hymenoptera	Chalcidoidea	Perilampidae		Perilampus	tristis	Rasplus JY	Cydia pomonella	Simon S	2006	France	Provence	Avignon	43.85 N 4.86 E	lco1490	hco2198	COI	652	Yes	0.5	2	Yes	Insecta	Hymenoptera	Perilampidae		Perilampus	chrysopae	93.92	Early-Release
FRCEF-07-89	KP072604	Arthropoda	Insecta	Hymenoptera	Chalcidoidea	Perilampidae		Perilampus	tristis	Rasplus JY	Cydia pomonella	Sauphanor B	2007	France	Midi-Pyrénée	Montauban	44.02 N 1.35 E	lco1490	hco2198	COI	652	Yes	0.2	2	Yes	Insecta	Hymenoptera	Perilampidae		Perilampus		94.27	Early-Release
Ev-09-6586	KP072605	Arthropoda	Insecta	Hymenoptera	Chalcidoidea	Perilampidae		Perilampus	tristis	Rasplus JY	Cydia pomonella	Franck P	2009	France	Rhône-Alpes	Valence	44.97 N 4.93E	lco1490	hco2198	COI	652	Yes	0.5	2	Yes	Insecta	Hymenoptera	Perilampidae		Perilampus		94.27	Early-Release
Ev-09-6475	KP072606	Arthropoda	Insecta	Hymenoptera	Chalcidoidea	Perilampidae		Perilampus	tristis	Rasplus JY	Cydia pomonella	Franck P	2009	France	Rhône-Alpes	Valence	44.97 N 4.93E	lco1490	hco2198	COI	652	Yes	0.2	2	Yes	Insecta	Hymenoptera	Perilampidae		Perilampus		94.27	Early-Release
Ev-09-6541	KP072607	Arthropoda	Insecta	Hymenoptera	Chalcidoidea	Perilampidae		Perilampus	tristis	Rasplus JY	Cydia pomonella	Franck P	2009	France	Rhône-Alpes	Valence	44.97 N 4.93E	lco1490	hco2198	COI	652	Yes	0.3	2	Yes	Insecta	Hymenoptera	Perilampidae		Perilampus		94.27	Early-Release
Ev-09-6457	KP072608	Arthropoda	Insecta	Hymenoptera	Chalcidoidea	Perilampidae		Perilampus	tristis	Rasplus JY	Cydia pomonella	Franck P	2009	France	Rhône-Alpes	Valence	44.97 N 4.93E	lco1490	hco2198	COI	652	Yes	0.5	2	Yes	Insecta	Hymenoptera	Perilampidae		Perilampus		94.27	Early-Release
Ev-09-6460	KP072609	Arthropoda	Insecta	Hymenoptera	Chalcidoidea	Perilampidae		Perilampus	tristis	Rasplus JY	Cydia pomonella	Franck P	2009	France	Rhône-Alpes	Valence	44.97 N 4.93E	lco1490	hco2198	COI	652	Yes	0.5	2	Yes	Insecta	Hymenoptera	Perilampidae		Perilampus		94.27	Early-Release
M-11-2-3278	KP072610	Arthropoda	Insecta	Hymenoptera	Ichneumonoidea	Ichneumonidae	Cryptinae	Mastrus	ridibundus	Maalouly M	Cydia pomonella	Maalouly M	2011	France	Rhône-Alpes	Valence	44.97 N 4.93E	lco1490	hco2198	COI	658	Yes	0	2	Yes	Insecta	Hymenoptera	Ichneumonidae	Cryptinae	Isadelphus		100	Early-Release
Ev-06-3165	KP072611	Arthropoda	Insecta	Hymenoptera	Ichneumonoidea	Ichneumonidae	Pimplinae	Liotryphon	caudatus	Cuenot E	Cydia pomonella	Franck P	2006	France	Provence	Avignon	43.81 N 4.94 E	lco1490	hco2198	COI	658	Yes	0	2	Yes	Insecta	Hymenoptera	Ichneumonidae	Pimplinae	Liotryphon	caudatus	99.85	Early-Release
Ev-07-6673	KP072612	Arthropoda	Insecta	Hymenoptera	Ichneumonoidea	Ichneumonidae	Campopleginae	Venturia	canescens	Franck P	Cydia pomonella	Franck P	2007	France	Provence	Avignon	43.85 N 4.86 E	lco1490	hco2198	COI	658	Yes	0.6	2	Yes	Insecta	Hymenoptera	Ichneumonidae	Campopleginae	Venturia	canescens	100	Published
M-11-1-1376	KP072613	Arthropoda	Insecta	Hymenoptera	Chalcidoidea	Eulophidae	Eulophinae	Hyssopus	palidus	Maalouly M	Cydia pomonella	Maalouly M	2011	France	Rhône-Alpes	Valence	44.97 N 4.93E	lco1490	hco2198	COI	652	Yes	0	2	Yes	Insecta	Hymenoptera	Eulophidae				91.79	Early-Release
M-11-3-4347	KP072614	Arthropoda	Insecta	Hymenoptera	Chalcidoidea	Pteromalidae	Pteromalinae	Dibrachys	cavus	Maalouly M	Cydia pomonella	Maalouly M	2011	France	Provence	Avignon	43.91 N 4.89 E	lco1490	hco2198	COI	652	Yes	0	2	Yes	Insecta	Hymenoptera	Pteromalidae	Pteromalinae	Dibrachys	cavus	100	Published
Avi-02-3	KP072615	Arthropoda	Insecta	Lepidoptera	Tortricoidea	Tortricidae	Olethreutinae	Cydia	pomonella	Franck P	Malus pumila	Franck P	2002	France	Provence	Avignon	43.87 N 4.68 E	lco1490	hco2198	COI	658	Yes	0	2	Yes	Insecta	Lepidoptera	Tortricidae	Olethreutinae	Cydia	pomonella	99.85	Early-Release
Val-03-8	KP072616	Arthropoda	Insecta	Lepidoptera	Tortricoidea	Tortricidae	Olethreutinae	Cydia	pomonella	Franck P	Malus pumila	Franck P	2003	France	Rhône-Alpes	Valence	44.97 N 4.93E	lco1490	hco2198	COI	658	Yes	0	2	Yes	Insecta	Lepidoptera	Tortricidae	Olethreutinae	Cydia	pomonella	99.85	Early-Release
Val-03-340	KP072617	Arthropoda	Insecta	Lepidoptera	Tortricoidea	Tortricidae	Olethreutinae	Cydia	pomonella	Franck P	Malus pumila	Franck P	2003	France	Rhône-Alpes	Valence	44.97 N 4.93E	lco1490	hco2198	COI	658	Yes	0	2	Yes	Insecta	Lepidoptera	Tortricidae	Olethreutinae	Cydia	pomonella	99.54	Published
Mai-03-256	KP072618	Arthropoda	Insecta	Lepidoptera	Tortricoidea	Tortricidae	Olethreutinae	Cydia	pomonella	Franck P	Malus pumila	Sauphanor B	2003	France	Provence	Avignon	43.83 N 4.78 E	lco1490	hco2198	COI	658	Yes	0	2	Yes	Insecta	Lepidoptera	Tortricidae	Olethreutinae	Cydia	pomonella	100	Published
Mai-03-180	KP072619	Arthropoda	Insecta	Lepidoptera	Tortricoidea	Tortricidae	Olethreutinae	Cydia	pomonella	Franck P	Malus pumila	Sauphanor B	2003	France	Provence	Avignon	43.83 N 4.78 E	lco1490	hco2198	COI	658	Yes	0	2	Yes	Insecta	Lepidoptera	Tortricidae	Olethreutinae	Cydia	pomonella	99.54	Published
Tch-05-43	KP072620	Arthropoda	Insecta	Lepidoptera	Tortricoidea	Tortricidae	Olethreutinae	Cydia	pomonella	Franck P	Malus pumila	Pultar O	2005	Czech Republic	Hradec-Králové	Königgrätz	50.17 N 15.70 E	lco1490	hco2198	COI	658	Yes	0	2	Yes	Insecta	Lepidoptera	Tortricidae	Olethreutinae	Cydia	pomonella	99.55	Published
Tch-05-57	KP072621	Arthropoda	Insecta	Lepidoptera	Tortricoidea	Tortricidae	Olethreutinae	Cydia	pomonella	Franck P	Malus pumila	Pultar O	2005	Czech Republic	Hradec-Králové	Königgrätz	50.17 N 15.70 E	lco1490	hco2198	COI	658	Yes	0	2	Yes	Insecta	Lepidoptera	Tortricidae	Olethreutinae	Cydia	pomonella	99.85	Published
Tch-05-94	KP072622	Arthropoda	Insecta	Lepidoptera	Tortricoidea	Tortricidae	Olethreutinae	Cydia	pomonella	Franck P	Malus pumila	Pultar O	2005	Czech Republic	Hradec-Králové	Königgrätz	50.17 N 15.70 E	lco1490	hco2198	COI	658	Yes	0	2	Yes	Insecta	Lepidoptera	Tortricidae	Olethreutinae	Cydia	pomonella	99.85	Early-Release
Pc-03-26	KP072623	Arthropoda	Insecta	Lepidoptera	Tortricoidea	Tortricidae	Olethreutinae	Cydia	pomonella	Franck P	Malus pumila	Charmillot PJ	2003	Switzerland	Vaud	Nyons	46.40 N 6.25 E	lco1490	hco2198	COI	658	Yes	0	2	Yes	Insecta	Lepidoptera	Tortricidae	Olethreutinae	Cydia	pomonella	99.85	Early-Release
Pm-03-24	KP072624	Arthropoda	Insecta	Lepidoptera	Tortricoidea	Tortricidae	Olethreutinae	Cydia	pomonella	Franck P	Malus pumila	Charmillot PJ	2003	Switzerland	Vaud	Nyons	46.40 N 6.25 E	lco1490	hco2198	COI	658	Yes	0.2	2	Yes	Insecta	Lepidoptera	Tortricidae	Olethreutinae	Cydia	pomonella	99.54	Published
Ev-06-1108	KP072625	Arthropoda	Insecta	Lepidoptera	Tortricoidea	Tortricidae	Olethreutinae	Grapholita	molesta	Siegwart M	Malus pumila	Franck P	2006	France	Provence	Avignon	43.82 N 4.89 E	lco1490	hco2198	COI	658	Yes	0	2	Yes	Insecta	Lepidoptera	Tortricidae	Olethreutinae	Grapholita	molesta	100	Published
Ev-06-1247	KP072626	Arthropoda	Insecta	Lepidoptera	Tortricoidea	Tortricidae	Olethreutinae	Grapholita	molesta	Siegwart M	Malus pumila	Franck P	2006	France	Provence	Avignon	43.81 N 4.89 E	lco1490	hco2198	COI	658	Yes	0	2	Yes	Insecta	Lepidoptera	Tortricidae	Olethreutinae	Grapholita	molesta	100	Published
Ev-06-811	KP072627	Arthropoda	Insecta	Lepidoptera	Tortricoidea	Tortricidae	Olethreutinae	Grapholita	molesta	Siegwart M	Malus pumila	Franck P	2006	France	Provence	Avignon	43.79 N 4.89 E	lco1490	hco2198	COI	658	Yes	0.2	2	Yes	Insecta	Lepidoptera	Tortricidae	Olethreutinae	Grapholita	molesta	100	Published
Ev-06-2183	KP072628	Arthropoda	Insecta	Lepidoptera	Tortricoidea	Tortricidae	Olethreutinae	Grapholita	molesta	Siegwart M	Malus pumila	Franck P	2006	France	Provence	Avignon	43.79 N 4.90 E	lco1490	hco2198	COI	658	Yes	0.5	2	Yes	Insecta	Lepidoptera	Tortricidae	Olethreutinae	Grapholita	molesta	100	Published
Ev-07-4041	KP072629	Arthropoda	Insecta	Lepidoptera	Tortricoidea	Tortricidae	Olethreutinae	Grapholita	molesta	Siegwart M	Malus pumila	Franck P	2007	France	Provence	Avignon	43.83 N 4.91 E	lco1490	hco2198	COI	658	Yes	0.3	2	Yes	Insecta	Lepidoptera	Tortricidae	Olethreutinae	Grapholita	molesta	100	Published
Ev-07-4634	KP072630	Arthropoda	Insecta	Lepidoptera	Tortricoidea	Tortricidae	Olethreutinae	Grapholita	molesta	Siegwart M	Malus pumila	Franck P	2007	France	Provence	Avignon	43.84 N 4.94 E	lco1490	hco2198	COI	658	Yes	0.6	2	Yes	Insecta	Lepidoptera	Tortricidae	Olethreutinae	Grapholita	molesta	100	Published
Ev-07-4680	KP072631	Arthropoda	Insecta	Lepidoptera	Tortricoidea	Tortricidae	Olethreutinae	Grapholita	molesta	Siegwart M	Malus pumila	Franck P	2007	France	Provence	Avignon	43.85 N 4.94 E	lco1490	hco2198	COI	658	Yes	0.6	2	Yes	Insecta	Lepidoptera	Tortricidae	Olethreutinae	Grapholita	molesta	100	Published
Ev-07-4840	KP072632	Arthropoda	Insecta	Lepidoptera	Tortricoidea	Tortricidae	Olethreutinae	Grapholita	molesta	Siegwart M	Malus pumila	Franck P	2007	France	Provence	Avignon	43.79 N 4.94 E	lco1490	hco2198	COI	658	Yes	0.3	2	Yes	Insecta	Lepidoptera	Tortricidae	Olethreutinae	Grapholita	molesta	100	Published
Ev-07-5292	KP072633	Arthropoda	Insecta	Lepidoptera	Tortricoidea	Tortricidae	Olethreutinae	Grapholita	molesta	Siegwart M	Malus pumila	Franck P	2007	France	Provence	Avignon	43.79 N 4.91 E	lco1490	hco2198	COI	658	Yes	0	2	Yes	Insecta	Lepidoptera	Tortricidae	Olethreutinae	Grapholita	molesta	100	Published
Ev-07-4841	KP072634	Arthropoda	Insecta	Lepidoptera	Tortricoidea	Tortricidae	Olethreutinae	Grapholita	molesta	Siegwart M	Malus pumila	Franck P	2007	France	Provence	Avignon	43.79 N 4.94 E	lco1490	hco2198	COI	658	Yes	0.2	2	Yes	Insecta	Lepidoptera	Tortricidae	Olethreutinae	Grapholita	molesta	100	Published
Ev-07-5314	KP072635	Arthropoda	Insecta	Lepidoptera	Tortricoidea	Tortricidae	Olethreutinae	Grapholita	molesta	Siegwart M	Malus pumila	Franck P	2007	France	Provence	Avignon	43.79 N 4.91 E	lco1490	hco2198	COI	658	Yes	0	2	Yes	Insecta	Lepidoptera	Tortricidae	Olethreutinae	Grapholita	molesta	100	Published
Ev-07-5409	KP072636	Arthropoda	Insecta	Lepidoptera	Tortricoidea	Tortricidae	Olethreutinae	Grapholita	molesta	Siegwart M	Malus pumila	Franck P	2007	France	Provence	Avignon	43.79 N 4.92 E	lco1490	hco2198	COI	658	Yes	0	2	Yes	Insecta	Lepidoptera	Tortricidae	Olethreutinae	Grapholita	molesta	100	Published
Ev-07-5592	KP072637	Arthropoda	Insecta	Lepidoptera	Tortricoidea	Tortricidae	Olethreutinae	Grapholita	molesta	Siegwart M	Malus pumila	Franck P	2007	France	Provence	Avignon	43.80 N 4.93 E	lco1490	hco2198	COI	658	Yes	0	2	Yes	Insecta	Lepidoptera	Tortricidae	Olethreutinae	Grapholita	molesta	100	Published
Ev-10-5502	KP072638	Arthropoda	Insecta	Lepidoptera	Tortricoidea	Tortricidae	Olethreutinae	Grapholita	molesta	Siegwart M	Malus pumila	Franck P	2010	France	Provence	Avignon	43.79 N 4.91 E	lco1490	hco2198	COI	658	Yes	0	2	Yes	Insecta	Lepidoptera	Tortricidae	Olethreutinae	Grapholita	molesta	100	Published
Ev-10-5503	KP072639	Arthropoda	Insecta	Lepidoptera	Tortricoidea	Tortricidae	Olethreutinae	Grapholita	molesta	Siegwart M	Malus pumila	Franck P	2010	France	Provence	Avignon	43.79 N 4.91 E	lco1490	hco2198	COI	658	Yes	0	2	Yes	Insecta	Lepidoptera	Tortricidae	Olethreutinae	Grapholita	molesta	100	Published
Ev-10-5846	KP072640	Arthropoda	Insecta	Lepidoptera	Tortricoidea	Tortricidae	Olethreutinae	Grapholita	molesta	Siegwart M	Malus pumila	Franck P	2010	France	Provence	Avignon	43.83 N 4.97 E	lco1490	hco2198	COI	658	Yes	0	2	Yes	Insecta	Lepidoptera	Tortricidae	Olethreutinae	Grapholita	molesta	100	Published
Ev-10-5331	KP072641	Arthropoda	Insecta	Lepidoptera	Tortricoidea	Tortricidae	Olethreutinae	Grapholita	molesta	Siegwart M	Malus pumila	Franck P	2010	France	Provence	Avignon	43.79 N 4.92 E	lco1490	hco2198	COI	658	Yes	0	2	Yes	Insecta	Lepidoptera	Tortricidae	Olethreutinae	Grapholita	molesta	100	Published
Div-09-6611	KP072642	Arthropoda	Insecta	Lepidoptera	Tortricoidea	Tortricidae	Olethreutinae	Cydia	splendana	Siegwart M	Castanea sativa	Boutitie A	2009	France	Languedoc	Nîmes	44.04 N 3.85 E	lco1490	hco2198	COI	658	Yes	0	2	Yes	Insecta	Lepidoptera	Tortricidae	Olethreutinae	Cydia	splendana	99.85	Early-Release
Div-09-6599	KP072643	Arthropoda	Insecta	Lepidoptera	Tortricoidea	Tortricidae	Olethreutinae	Cydia	splendana	Siegwart M	Castanea sativa	Boutitie A	2009	France	Languedoc	Nîmes	44.04 N 3.85 E	lco1490	hco2198	COI	658	Yes	0	2	Yes	Insecta	Lepidoptera	Tortricidae	Olethreutinae	Cydia	splendana	99.85	Early-Release
Div-09-6598	KP072644	Arthropoda	Insecta	Lepidoptera	Tortricoidea	Tortricidae	Olethreutinae	Cydia	splendana	Siegwart M	Castanea sativa	Boutitie A	2009	France	Languedoc	Nîmes	44.04 N 3.85 E	lco1490	hco2198	COI	658	Yes	0	2	Yes	Insecta	Lepidoptera	Tortricidae	Olethreutinae	Cydia	splendana	99.85	Early-Release
Div-09-6612	KP072645	Arthropoda	Insecta	Lepidoptera	Tortricoidea	Tortricidae	Olethreutinae	Cydia	splendana	Siegwart M	Castanea sativa	Boutitie A	2009	France	Languedoc	Nîmes	44.04 N 3.85 E	lco1490	hco2198	COI	658	Yes	0	2	Yes	Insecta	Lepidoptera	Tortricidae	Olethreutinae	Cydia	splendana	99.85	Early-Release
Div-03-6	KP072646	Arthropoda	Insecta	Lepidoptera	Tortricoidea	Tortricidae	Olethreutinae	Grapholita	lobarzewskii	Charmillot PJ	Malus pumila	Charmillot PJ	2003	Switzerland	Vaud	Nyons	46.40 N 6.25 E	lco1490	hco2198	COI	658	Yes	0	2	Yes	Insecta	Lepidoptera	Tortricidae	Olethreutinae	Grapholita	lobarzewskii	100	Early-Release
Div-03-5	KP072647	Arthropoda	Insecta	Lepidoptera	Tortricoidea	Tortricidae	Olethreutinae	Grapholita	lobarzewskii	Charmillot PJ	Malus pumila	Charmillot PJ	2003	Switzerland	Vaud	Nyons	46.40 N 6.25 E	lco1490	hco2198	COI	658	Yes	0	2	Yes	Insecta	Lepidoptera	Tortricidae	Olethreutinae	Grapholita	lobarzewskii	100	Early-Release
Div-03-7	KP072648	Arthropoda	Insecta	Lepidoptera	Tortricoidea	Tortricidae	Olethreutinae	Grapholita	lobarzewskii	Charmillot PJ	Malus pumila	Charmillot PJ	2003	Switzerland	Vaud	Nyons	46.40 N 6.25 E	lco1490	hco2198	COI	658	Yes	0	2	Yes	Insecta	Lepidoptera	Tortricidae	Olethreutinae	Grapholita	lobarzewskii	100	Early-Release
Div-03-35	KP072649	Arthropoda	Insecta	Lepidoptera	Tortricoidea	Tortricidae	Olethreutinae	Grapholita	lobarzewskii	Charmillot PJ	Malus pumila	Charmillot PJ	2003	Switzerland	Vaud	Nyons	46.40 N 6.25 E	lco1490	hco2198	COI	658	Yes	0	2	Yes	Insecta	Lepidoptera	Tortricidae	Olethreutinae	Grapholita	lobarzewskii	100	Early-Release
Div-03-36	KP072650	Arthropoda	Insecta	Lepidoptera	Tortricoidea	Tortricidae	Olethreutinae	Grapholita	lobarzewskii	Charmillot PJ	Malus pumila	Charmillot PJ	2003	Switzerland	Vaud	Nyons	46.40 N 6.25 E	lco1490	hco2198	COI	658	Yes	0	2	Yes	Insecta	Lepidoptera	Tortricidae	Olethreutinae	Grapholita	lobarzewskii	100	Early-Release
Div-13-12	KP072651	Arthropoda	Insecta	Lepidoptera	Tortricoidea	Tortricidae	Olethreutinae	Grapholita	funebrana	Siegwart M	Prunus domestica	Montagnon JM	2013	France	Provence	Avignon	43.73 N 5.18 E	lco1490	hco2198	COI	658	Yes	0	2	Yes	Insecta	Lepidoptera	Tortricidae	Olethreutinae	Grapholita	funebrana	100	Early-Release
Div-13-15	KP072652	Arthropoda	Insecta	Lepidoptera	Tortricoidea	Tortricidae	Olethreutinae	Grapholita	funebrana	Siegwart M	Prunus domestica	Montagnon JM	2013	France	Provence	Avignon	43.73 N 5.18 E	lco1490	hco2198	COI	658	Yes	0	2	Yes	Insecta	Lepidoptera	Tortricidae	Olethreutinae	Grapholita	funebrana	100	Early-Release
Div-13-16	KP072653	Arthropoda	Insecta	Lepidoptera	Tortricoidea	Tortricidae	Olethreutinae	Grapholita	funebrana	Siegwart M	Prunus domestica	Montagnon JM	2013	France	Provence	Avignon	43.73 N 5.18 E	lco1490	hco2198	COI	658	Yes	0	2	Yes	Insecta	Lepidoptera	Tortricidae	Olethreutinae	Grapholita	funebrana	100	Early-Release
Div-13-17	KP072654	Arthropoda	Insecta	Lepidoptera	Tortricoidea	Tortricidae	Olethreutinae	Grapholita	funebrana	Siegwart M	Prunus domestica	Montagnon JM	2013	France	Provence	Avignon	43.73 N 5.18 E	lco1490	hco2198	COI	658	Yes	0	2	Yes	Insecta	Lepidoptera	Tortricidae	Olethreutinae	Grapholita	funebrana	100	Early-Release
Val-05-328	KP402060	Arthropoda	Insecta	Hymenoptera	Ichneumonoidea	Braconidae	Agathidinae	Bassus	rufipes	Rieux R	Cydia pomonella	Franck P	2005	France	Rhône-Alpes	Valence	44.98 N 4.93 E	lco1490	hco2198	COI	655	No	0	2	No	Insecta	Hymenoptera	Braconidae	Agathidinae	Agathis		93	Published
Val-05-330	KP402061	Arthropoda	Insecta	Hymenoptera	Ichneumonoidea	Braconidae	Agathidinae	Bassus	rufipes	Rieux R	Cydia pomonella	Franck P	2005	France	Rhône-Alpes	Valence	44.98 N 4.93 E	lco1490	hco2198	COI	655	No	1.1	2	No	Insecta	Hymenoptera	Braconidae	Agathidinae	Agathis		93	Published
M-11-1-291	KP402062	Arthropoda	Insecta	Hymenoptera	Ichneumonoidea	Braconidae	Agathidinae	Bassus	rufipes	Maalouly M	Cydia pomonella	Maalouly M	2011	France	Provence	Avignon	43.91 N 4.89 E	lco1490	hco2198	COI	655	No	0	2	No	Insecta	Hymenoptera	Braconidae	Agathidinae	Agathis		93	Published
M-11-3-4098	KP402063	Arthropoda	Insecta	Hymenoptera	Ichneumonoidea	Braconidae	Agathidinae	Bassus	rufipes	Maalouly M	Cydia pomonella	Maalouly M	2011	France	Provence	Avignon	43.91 N 4.88 E	lco1490	hco2198	COI	655	No	0.2	2	No	Insecta	Hymenoptera	Braconidae	Agathidinae	Agathis		93	Published
Ev-10-8944	KP402064	Arthropoda	Insecta	Hymenoptera	Ichneumonoidea	Braconidae	Agathidinae	Bassus	rufipes	Maalouly M	Cydia pomonella	Franck P	2010	France	Provence	Avignon	43.48N 4.54 E	lco1490	hco2198	COI	655	No	0	2	No	Insecta	Hymenoptera	Braconidae	Agathidinae	Agathis		93	Published
